# Supplementary material for: (-)-Epigallocatechin-3-O-Gallate Regulates Muscle Growth, Antioxidant Status, and Nutritional Composition of Juvenile Common Carp (Cyprinus carpio L.)
Source: Aquac Nutr. 2024 Mar 20;2024:7134404. doi: 10.1155/2024/7134404 (PMC10977338; doi:10.1155/2024/7134404)
Supplement: Supplementary 1 — Composition of ingredients and nutrient content of experimental diets in feeding trial (g/kg, dry matter). [file 7134404.f1.docx]

**Table S1. Ingredient composition and nutrient content of experimental diets in feeding trial (g/kg, dry matter).**

| **Ingredients (g/kg)** | Dietary EGCG levels (g/kg) | | | | |
| --- | --- | --- | --- | --- | --- |
| 0 | 0.05 | 0.25 | 0.5 | 1 |
| Soybean meal 1 | 370 | 370 | 370 | 370 | 370 |
| Cottonseed meal 2 | 90 | 90 | 90 | 90 | 90 |
| Rapeseed meal 3 | 230 | 230 | 230 | 230 | 230 |
| Fish meal 4 | 100 | 100 | 100 | 100 | 100 |
| Wheat meal 5 | 45 | 45 | 45 | 45 | 45 |
| Soybean oil 6 | 75 | 75 | 75 | 75 | 75 |
| Ca (H2PO4)2 7 | 25 | 25 | 25 | 25 | 25 |
| Vitamin premix 8 | 20 | 20 | 20 | 20 | 20 |
| Mineral premix 9 | 20 | 20 | 20 | 20 | 20 |
| Microcrystalline cellulose 10 | 25 | 24.5 | 24.75 | 24.5 | 24 |
| Epigallocatechin-3-O-gallate 11 | 0 | 0.05 | 0.25 | 0.5 | 1 |
| Epigallocatechin-3-O-gallate 12 | 0 | 0.049 | 0.240 | 0.494 | 0.949 |
| Total | 1000 | 1000 | 1000 | 1000 | 1000 |
| Proximate composition 13 | | | | | |
| Crude protein | 360.5 | 347.4 | 348.8 | 367.9 | 356.9 |
| Crude lipid | 98.5 | 99.1 | 96.6 | 103.4 | 99.8 |
| Crude ash | 132.7 | 144.5 | 146.5 | 124.5 | 144.8 |
| Moisture | 86.9 | 88.7 | 88.3 | 88.4 | 86.6 |

1 Provided by Henan Tongwei Co., Ltd., Xinxiang, China. 64 % crude protein.

2 Provided by Henan Hefeng Co., Ltd., Tangshan, China. 15.7 % crude protein.

3 Provided by Henan Hefeng Co., Ltd., Tangshan, China. 43.5 % crude protein.

4 Provided by Henan Tongwei Co., Ltd., Xinxiang, China. 44.2 % crude protein.

5 Provided by Henan Wudeli Co., Ltd., Xinxiang, China. 13.4 % crude protein.

6 Provided by Shandong Luhua Group Co., Ltd., China.

7,8 Provided by Henan Tongwei Co., Ltd., Xinxiang, China.

9 Provided by Henan Tongwei Co., Ltd., Xinxiang, China. Vitamin premix (g/kg premix): Retinyl acetate, 1.2121; cholecalciferol, 1.2000; all-rac-a-tocopherol, 20.0000; menadione, 9.0909; thiamine, 10.8696; Riboflavin, 7.5000; ascorbicacid, 30.0000; pyridoxinehydrochloride, 12.1212; cyanocobalamin, 2.0000; folicacid, 40.0000; biotin, 12.5000; nicotinicacid, 40.4040; D-Capantothenate, 16.1290; inositol, 204.0816; cellulose, 592.8915.

10 Provided by Henan Tongwei Co., Ltd., Xinxiang, China. Mineral premix (g/kg premix): FeC6H5O7, 11.43; ZnSO4⋅7H2O, 11.79; MnSO4⋅H2O (99 %), 2.49; CuSO4⋅5H2O (99 %), 1.06; MgSO4⋅7H2O (99 %), 27.31; KH2PO4, 233.2; NaH2PO4, 228.39; C6H10CaO6⋅5H2O (98 %), 34.09; CoCl2⋅6H2O (99 %), 1.36.

11 Provided by Nanjing Daosifu Biotech Co., Ltd., Nanjing, China; purity ≥ 98%.

12 The measured value of EGCG by the method of High-performance liquid chromatography (HPLC), The method of HPLC was based on SN/T 3848-2014 with some minor modifications.

13 Crude protein, lipid, and ash levels were measured value.
