# Supplementary material for: (-)-Epigallocatechin-3-O-Gallate Regulates Muscle Growth, Antioxidant Status, and Nutritional Composition of Juvenile Common Carp (Cyprinus carpio L.)
Source: Aquac Nutr. 2024 Mar 20;2024:7134404. doi: 10.1155/2024/7134404 (PMC10977338; doi:10.1155/2024/7134404)
Supplement: Supplementary 2 — Real-time PCR primer sequences used. [file 7134404.f2.docx]

**Table S2. Real-time PCR primer sequences used.**

| **Gene** | **Sequence (5′–3′)** | **Genbank ID** | **Efficiency**  **%** | **Size (bp)** |
| --- | --- | --- | --- | --- |
| *sod* F1 | GTCCGCACTTCAACCCTCAT | XM 019111527.2 | 96.4 | 169 |
| *sod* R | ATGGTCCTCCCAATGACCGA |
| *cat*F2 | TTCCTGTGGGACGCCTTGT | JF411604.1 | 95.1 | 170 |
| *cat*R | TCCGAGCCGATGCCTATGT |
| *gpx*F3 | AACCAGTTCGGACATCA | GQ376155.1 | 95.0 | 204 |
| *gpx*R | ATCACCCATCAAGGACA |
| *keap1*F4 | CAGTGGGCGAGAAGTGT | JX470752.1 | 91.4 | 112 |
| *keap1*R | TTTGATGGCTCCAGGTT |
| *nrf2*F5 | ACGACAAATGCCGAAGT | JX462955.1 | 93.4 | 115 |
| *nrf2*R | CTGCCTCATCTAGTGGAAA |
| *pax7F*6 | GCTCCATTAGTCGGGTTC | XM_042766854.1 | 94.4 | 166 |
| *pax7R* | GGCTCCGACTCCACATC |
| *MyodF*7 | CAACGACACGCCAAAT | XM_019068329.2 | 97.8 | 122 |
| *MyodR* | CTGACAGCACGGGACA |
| *Mrf4F*8 | TGTCTTATGTGGGCTTGT | XM_019092292.2 | 93.0 | 152 |
| *Mrf4R* | CTCTGGTTCGGATTGG |
| *myogeninF*9 | GAAGGCGGCGATAACTTC | XM_019096789.2 | 98.7 | 189 |
| *myogeninR* | CTGCTGCTCCTGGTGAG |
| *mstnbF*10 | AACTCCGACTCAAACAGG | XM_042764169.1 | 95.5 | 166 |
| *mstnbR* | ATGGTCTCAGTGGTGGC |
| *pi3kF*11 | GAAGATGACGACTGGAGAG | XM_019085737.2 | 104.1 | 400 |
| *pi3kR* | GCCTGTAGTGACTGATGAG |
| *aktF*12 | ACTGTTATTGAGCGCACCTT | XM_042774924.1 | 97.2 | 116 |
| *aktR* | TCCATTGGCTCCTCCTCTTC |
| *mtorF*13 | ATCATACGCATCCAGTCCATTG | FJ899680.1 | 102.1 | 190 |
| *mtorR* | GGTCATTAGCCAGTAGAGTGTTC |
| *4ebpF*14 | TCCTGGAGGCACTTTAT | XM_019083109.1 | 97.8 | 106 |
| *4ebpR* | TGGTGGGGTCTGGGCGAT |
| *elovl5F*15 | GAGGA TGGCTTCTACTG | MK893918.1 | 94.8 | 204 |
| *elovl5R* | ATCTGCCTTGATACACT |
| *acsl6F*16 | TTCCTTCCTGCCTCTTG | MF002109.1 | 98.5 | 248 |
| *acsl6R* | CCAGCCCTTTCCTCTTT |
| *pparaF*17 | GCGTGCTTTGGCTTTGTT | FJ849065.1 | 91.2 | 105 |
| *pparaR* | GGGAAAGAGCAGCACGAG |
| *cpt-1F*18 | CAGATGGAAAGTGTTGCTAATGAC | JQ361077.1 | 92.0 | 168 |
| *cpt-1R* | TGTGTAGAAGTTGCTGTTGACCA |
| *fasF*19 | GACAGGCCGCTATTGCTATT | GQ466045.1 | 95.5 | 110 |
| *fasR* | TGCCGTAAGCTGAGGAAATC |
| *18sF*20 | GAGACTCCGGCTTGCTAAAT | FJ710826.1 | 94.1 | 107 |
| *18sR* | CAGACCTGTTATTGCTCCATCT |

1 sod: superoxide dismutase;2 *cat*, catalase; 3 *gpx*, glutathione peroxidase; 4 *keap1*, kelch-like ECH-associated protein 1; 5 *nrf2*, nuclear factor erythroid-2-related factor 2; 6 *pax7,* paired box 7;7 *myod,* myogenic differentiation antigen; 8 *mrf4,* myogenic regulatory factor 4; 9 *Myogenin,* myogenin; 10 *mstnb,* myostatin b;11*pi3k,* phosphoinositide 3-kinase; 12*akt,* protein kinase B; 13 *mtor,* target of rapamycin; 14 *4ebp,* eIF4E-binding protein; 15 *elovl5,*fatty acyl elongase 5; 16 *acsl6,* long-chain fatty acyl-CoA synthetase 6; 17 *ppara,* peroxisome proliferator activated receptor α; 18 *cpt-1,* carnitine palmitoyltransferase 1; 19 *fas,* fatty acid synthetase; 20*18s*,*18s* ribosomal RNA.
