# Supplementary material for: (-)-Epigallocatechin-3-O-Gallate Regulates Muscle Growth, Antioxidant Status, and Nutritional Composition of Juvenile Common Carp (Cyprinus carpio L.)
Source: Aquac Nutr. 2024 Mar 20;2024:7134404. doi: 10.1155/2024/7134404 (PMC10977338; doi:10.1155/2024/7134404)
Supplement: Supplementary 5 — Effect of dietary EGCG on the fatty acid content in the muscle of common carp (C. carpio L.) (% total fatty acid of dry matter). [file 7134404.f5.docx]

**Table S4. Effect of dietary EGCG on fatty acid content in common carp muscle (*Cyprinus carpio* L.) (% total fatty acid of dry matter).**

| **Index** | **Dietary EGCG levels (g/kg)** | | | |  | ***P-*value** | | |
| --- | --- | --- | --- | --- | --- | --- | --- | --- |
| **0** | **0.05** | **0.25** | **0.5** | **1** | **A** | **L** | **Q** |
| C 14:0 | 0.48 ± 0.03 b | 0.54 ± 0.03 ab | 0.48 ± 0.01 b | 0.67 ± 0.11 ab | 0.73 ± 0.02 a | 0.002 | 0.004 | 0.244 |
| C 16:0 | 22.20 ± 0.54 a | 20.64 ± 0.07 bc | 19.86 ± 0.09 c | 21.77 ± 0.56 ab | 22.42 ± 0.39 a | 0.006 | 0.241 | 0.001 |
| C 18:0 | 7.48 ± 0.14 a | 6.53± 0.07 c | 6.57 ± 0.05 c | 7.13 ± 0.06 b | 6.99 ± 0.03 b | < 0.001 | 0.160 | < 0.001 |
| C 20:0 | 0.21 ± 0.01 a | 0.18 ± 0.01 b | 0.19 ± 0.01 ab | 0.19 ± 0.02 ab | 0.18 ± 0.00 b | 0.092 | 0.080 | 0.393 |
| SFA 1 | 30.37 ± 0.65 a | 27.89 ± 0.06 b | 27.09 ± 0.12 b | 29.75 ± 0.65 a | 30.31 ± 0.37 a | 0.005 | 0.369 | < 0.001 |
| C 16:1 | 2.31 ± 0.07 a | 2.55 ± 0.18 a | 2.13 ± 0.11 ab | 1.49 ± 0.46 b | 1.08 ± 0.87 b | 0.209 | 0.006 | 0.239 |
| C 18:1 | 29.63 ± 0.62 ab | 30.21± 0.65 a | 29.11 ± 0.27 ab | 27.84 ± 0.42 b | 28.58± 0.72 ab | 0.096 | 0.031 | 0.941 |
| C 20:1 | 1.52 ± 0.01 a | 1.47 ± 0.06 ab | 1.40 ± 0.01 ab | 1.41 ± 0.06 ab | 1.38 ± 0.01 b | 0.125 | 0.017 | 0.364 |
| MUFA2 | 33.47 ± 0.70 ab | 34.23± 0.89 a | 32.64 ± 0.28 ab | 30.73 ± 0.95 b | 31.04 ± 1.13 b | 0.060 | 0.010 | 0.709 |
| C 20:2 | 0.99 ± 0.04 | 0.99 ± 0.02 | 0.99 ± 0.02 | 1.03 ± 0.04 | 0.93 ± 0.02 | 0.303 | 0.362 | 0.160 |
| C 18:2n6 | 22.41 ± 0.61 c | 23.96 ± 0.38 b | 25.49 ± 0.23 a | 24.01 ± 0.10 b | 23.93 ± 0.27 b | 0.002 | 0.031 | 0.001 |
| C 18:3n6 | 0.52 ± 0.02 b | 0.57 ± 0.01 ab | 0.65 ± 0.03 a | 0.51 ± 0.01 b | 0.52 ± 0.05 b | 0.020 | 0.539 | 0.012 |
| C 20:3n6 | 2.21 ± 0.12 | 2.19 ± 0.06 | 2.33 ± 0.07 | 2.40 ± 0.05 | 2.20 ± 0.12 | 0.406 | 0.506 | 0.221 |
| n-6 PUFA3 | 25.13 ± 0.73 c | 26.73 ± 0.43 b | 28.47 ± 0.21 a | 26.91 ± 0.15 b | 26.55 ± 0.43 b | 0.005 | 0.056 | 0.001 |
| C 18:3n3 | 0.61 ± 0.04 c | 0.77 ± 0.01 b | 0.85 ± 0.02 a | 0.66 ± 0.01 c | 0.65 ± 0.00 c | < 0.001 | 0.663 | < 0.001 |
| C 20:3n3 | 4.65 ± 0.26 ab | 4.46 ± 0.24 b | 4.87 ± 0.12 ab | 5.28 ± 0.09 a | 5.03 ± 0.22 ab | 0.095 | 0.029 | 0.887 |
| C 20:5n3 (EPA) | 0.60 ± 0.01 ab | 0.51 ± 0.02 b | 0.49 ± 0.03 b | 0.72 ± 0.10 a | 0.76 ± 0.06 a | 0.017 | 0.012 | 0.026 |
| C 22:6n3  (DHA) | 4.18 ± 0.25 b | 4.42 ± 0.15 ab | 4.62 ± 0.07 ab | 4.92 ± 0.11 a | 4.73 ± 0.19 ab | 0.074 | 0.012 | 0.258 |
| n-3 PUFA4 | 10.04 ± 0.54 b | 10.16 ± 0.42 b | 10.82 ± 0.19 ab | 11.58 ± 0.24 a | 11.17 ± 0.48 ab | 0.090 | 0.015 | 0.537 |
| PUFA5 | 36.16 ± 1.26 b | 37.88 ± 0.87 ab | 40.27 ± 0.22 a | 39.52 ± 0.36 a | 38.65 ± 0.92 ab | 0.041 | 0.029 | 0.022 |
| UFA 6 | 69.63 ± 0.65 b | 72.11 ± 0.06 a | 72.91 ± 0.12 a | 70.25 ± 0.65 b | 69.69 ± 0.37 b | 0.005 | 0.242 | < 0.001 |
| n-3/n-6 | 0.40 ± 0.01 ab | 0.38 ± 0.01 b | 0.38 ± 0.01 b | 0.43 ± 0.01 a | 0.42 ± 0.01 a | 0.016 | 0.016 | 0.099 |
| HUFA7 | 11.64 ± 0.63 b | 11.58 ± 0.47 b | 12.30 ± 0.27 ab | 13.32 ± 0.26 a | 12.72 ± 0.59 ab | 0.114 | 0.025 | 0.675 |
| IA8 | 0.35 ± 0.01 a | 0.32 ± 0.00 b | 0.30 ± 0.00 b | 0.35 ± 0.02 a | 0.36 ± 0.01 a | 0.004 | 0.048 | 0.001 |
| IT 9 | 0.51 ± 0.02 a | 0.45 ± 0.01 bc | 0.42 ± 0.00 c | 0.46 ± 0.01 bc | 0.48 ± 0.01 ab | 0.010 | 0.338 | 0.001 |
| HPI 10 | 2.89 ± 0.09 b | 3.16 ± 0.03 a | 3.35 ± 0.01 a | 2.89 ± 0.13 b | 2.75 ± 0.06 b | 0.002 | 0.043 | < 0.001 |
| LA/ALA11 | 37.03 ± 1.23 a | 31.16 ± 0.11 b | 30.11 ± 0.54 b | 36.18 ± 0.63 a | 36.90 ± 0.16 a | < 0.001 | 0.049 | < 0.001 |

Values are means ± SEM (n = 3). One-way ANOVA followed by Duncan’s test were used to analyze the discrepancy among all the groups. Values in the same row with different superscripts represent statistically significant difference (*P* < 0.05). The *P*-values indicate a significantly linear or quadratic dose response relationship (*P* < 0.05). Liner trend and quadratic trend were analyzed by polynomial contrasts (A, ANOVA; L, linear; Q, quadratic). EGCG was supplemented at 0, 0.05, 0.25, 0.5, or 1 g/kg. 1 Σ SFA, Saturated fatty acid; 2 Σ MUFA, Monounsaturated fatty acid; 3 Σn-6 PUFA, n-6 polyunsaturated fatty acids; 4 Σ n-3 PUFA, n-3 polyunsaturated fatty acids; 5 Σ PUFA, polyunsaturated fatty acids; 6 UFA, Unsaturated fatty acid; 7 Σ HUFA, Highly Unsaturated Fatty Acid; 8 IA, index of atherogenicity. IA = [C 12:0 + (4 × C 14:0) + C 16:0] / UFA; 9 IT, index of thrombogenicity. IT = (C 14:0 + C 16:0 + C 18:0) / [(0.5 × MUFA) + (0.5 × n-6 PUFA) + (3 × n-3 PUFA) + (n-3/n-6)]; 10 HPI, health-promoting index. HPI = UFA / [C 12:0 + (4 × C 14:0) + C 16:0]; 11 LA/ALA = C 18:2n-6 /C 18:3.
